# Supplementary material
Source: PubMed Central journal article supplement (PMC3202018)

### Appendix 1: Demographic data, clinical characteristics, Medicare payments, and hospital disposition of Medicare beneficiaries hospitalized for ICH

| Variable                            | Patients with no chronic life-sustaining procedure (n = 29,322) | Patients with feeding tube (n = 2076) | P value* | Patients with tracheostomy (n = 294) | P value† | Patients with feeding tube and tracheostomy (n = 518) | P value‡ |
|-------------------------------------|-----------------------------------------------------------------|---------------------------------------|----------|--------------------------------------|----------|-------------------------------------------------------|----------|
| Age, years, median (IQR)            | 80 ± 11                                                         | 80 ± 10                               | .71      | 75 ± 11                              | <.01     | 74 ± 9                                                | <.01     |
| Males, %                            | 43                                                              | 45                                    | .14      | 59                                   | <.01     | 56                                                    | <.01     |
| Race/ethnicity, %                   |                                                                 |                                       |          |                                      |          |                                                       |          |
| Caucasian                           | 85                                                              | 77                                    | <.01     | 76                                   | <.01     | 67                                                    | <.01     |
| Black                               | 9                                                               | 16                                    |          | 20                                   |          | 24                                                    |          |
| Other                               | 6                                                               | 7                                     |          | 4                                    |          | 9                                                     |          |
| High modified Charlson Index, %     | 16                                                              | 17                                    | .57      | 16                                   | .99      | 15                                                    | .55      |
| Coma, %                             | 7                                                               | 4                                     | <.01     | 5                                    | .19      | 7                                                     | .96      |
| Ventilator, %                       | 22%                                                             | 19                                    | <.01     | NA                                   |          | NA                                                    |          |
| Craniotomy, %                       | 4%                                                              | 10                                    | <.01     | 37                                   | <.01     | 27                                                    | <.01     |
| Ventriculostomy, n %                | 3%                                                              | 6                                     | <.01     | 31                                   | <.01     | 29                                                    | <.01     |
| LOS, days, median (IQR)             | 4 ± 5                                                           | 14 ± 10                               | <.01     | 25 ± 19                              | <.01     | 25 ± 18                                               | <.01     |
| Medicare payments, \$, median (IQR) | 6008 ± 2217                                                     | 6786 ± 5927                           | <.01     | 84,810 ± 43,632                      | <.01     | 80,022 ± 47,591                                       | <.01     |
| Discharge location, %               |                                                                 |                                       | <.01     |                                      | <.01     |                                                       | <.01     |
| Home                                | 19                                                              | 7                                     |          | 2                                    |          | 2                                                     |          |
| Inpatient rehabilitation            | 14                                                              | 12                                    |          | 11                                   |          | 9                                                     |          |
| Skilled nursing facility            | 22                                                              | 62                                    |          | 21                                   |          | 34                                                    |          |
| Long-term care facility             | 1                                                               | 6                                     |          | 27                                   |          | 30                                                    |          |
| Hospice                             | 5                                                               | 3                                     |          | 4                                    |          | 2                                                     |          |
| In-hospital mortality               | 36                                                              | 8                                     |          | 29                                   |          | 15                                                    |          |
| Other                               | 4                                                               | 2                                     |          | 7                                    |          | 8                                                     |          |

Abbreviations: IQR, interquartile range; NA, not applicable.

\*P value for no procedure versus feeding tube.

†P value for no procedure versus tracheostomy.

‡P value for no procedure versus tracheostomy and feeding tube.

### Appendix 2: Kaplan-Meier survival curves showing survival in patients with ICH stratified by procedure (P < .01, log-rank test).

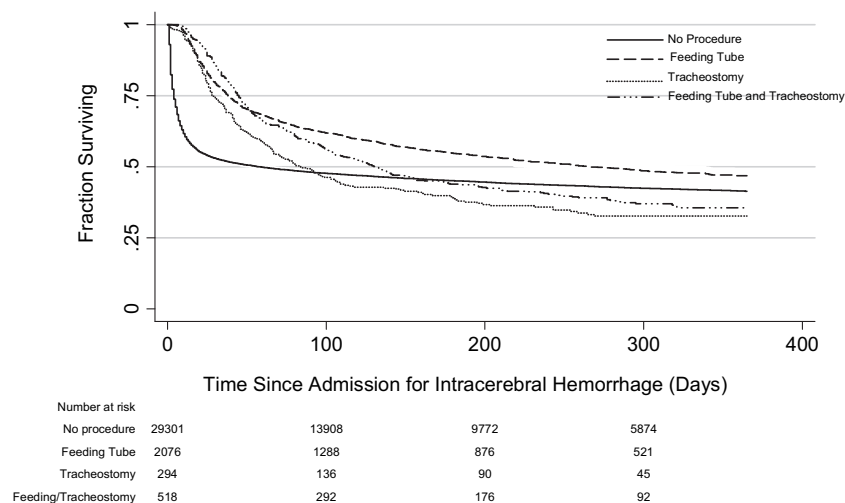

Supplement: NIHMS299740-supplement-1-2.pdf [file NIHMS299740-supplement-1-2.pdf]
